# Supplementary material for: Laser induced white emission generation from La1−xNdxAlO3 nanocrystals
Source: Royal Society of Chemistry journal article supplement (doi:10.1039/d2dt03553g), 2023-01-01
Supplement: d2dt03553g1.pdf [file d2dt03553g1.pdf]

## Supplementary Materials

### Laser induced white emission generation from $\text{La}_{1-x}\text{Nd}_x\text{AlO}_3$ nanocrystals

J. M. Goncalves, M. Stefanski, R. Tomala, A. Musialek and W. Strek.

*Institute of Low Temperature and Structure Research,*

*Polish Academy of Sciences, 50-422 Wroclaw, Poland*

corresponding author: j.goncalves@intibs.pl

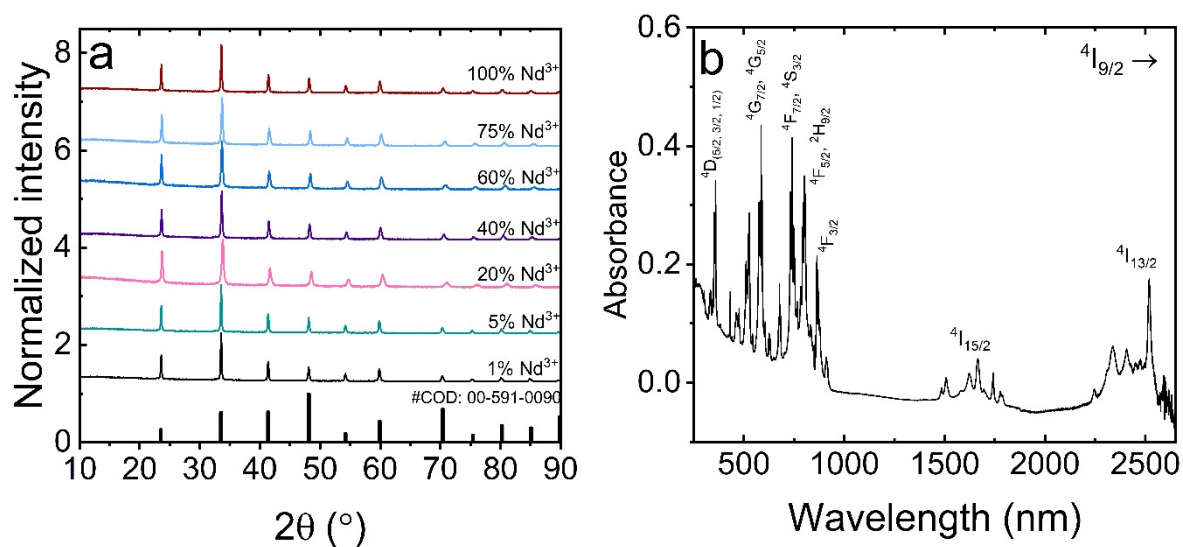

Fig. S1. Powder XRD of  $\text{La}_{1-x}\text{AlO}_3:x\text{Nd}^{3+}$  perovskites (a) and diffuse reflectance spectra of  $\text{NdAlO}_3$  (b).

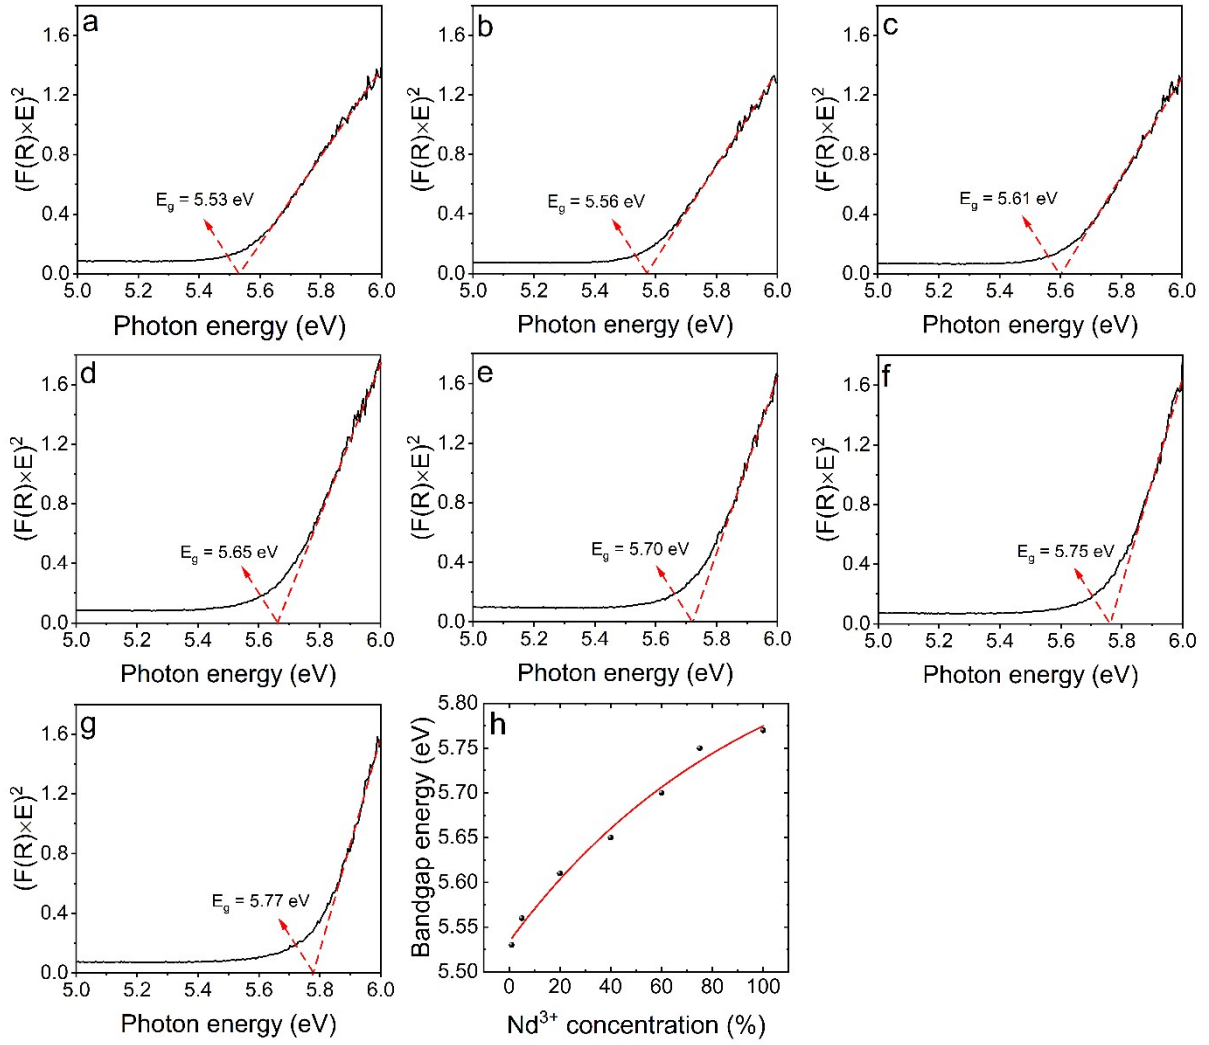

Fig. S2. Tauc plots for bandgap energy calculations of (a)  $\text{LaAlO}_3:1\%\text{Nd}^{3+}$ , (b)  $\text{LaAlO}_3:5\%\text{Nd}^{3+}$ , (c)  $\text{LaAlO}_3:20\%\text{Nd}^{3+}$ , (d)  $\text{LaAlO}_3:40\%\text{Nd}^{3+}$ , (e)  $\text{LaAlO}_3:60\%\text{Nd}^{3+}$ , (f)  $\text{LaAlO}_3:75\%\text{Nd}^{3+}$ , (g)  $\text{NdAlO}_3$  and (h) the correlation of the bandgap energy with  $\text{Nd}^{3+}$  concentration.

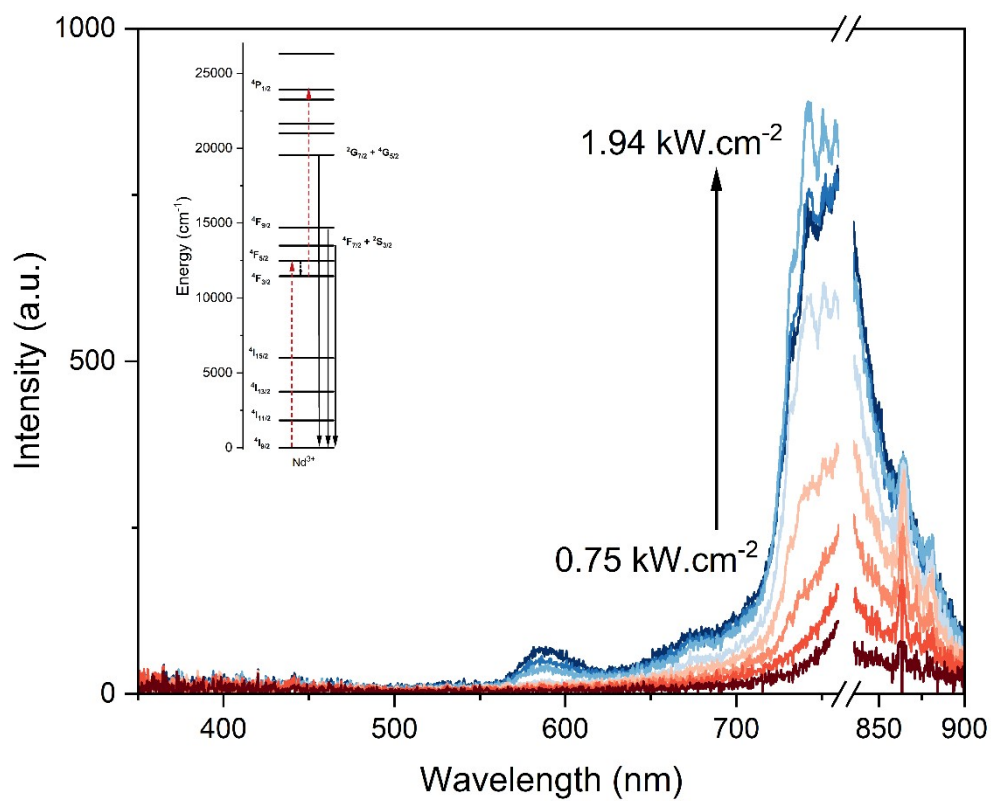

Fig. S3. Emission spectra of  $\text{LaAlO}_3:1\%\text{Nd}^{3+}$  at low power excitation showing 2 photon upconversion. Inset: Simplified energy level diagram containing relevant energy levels.

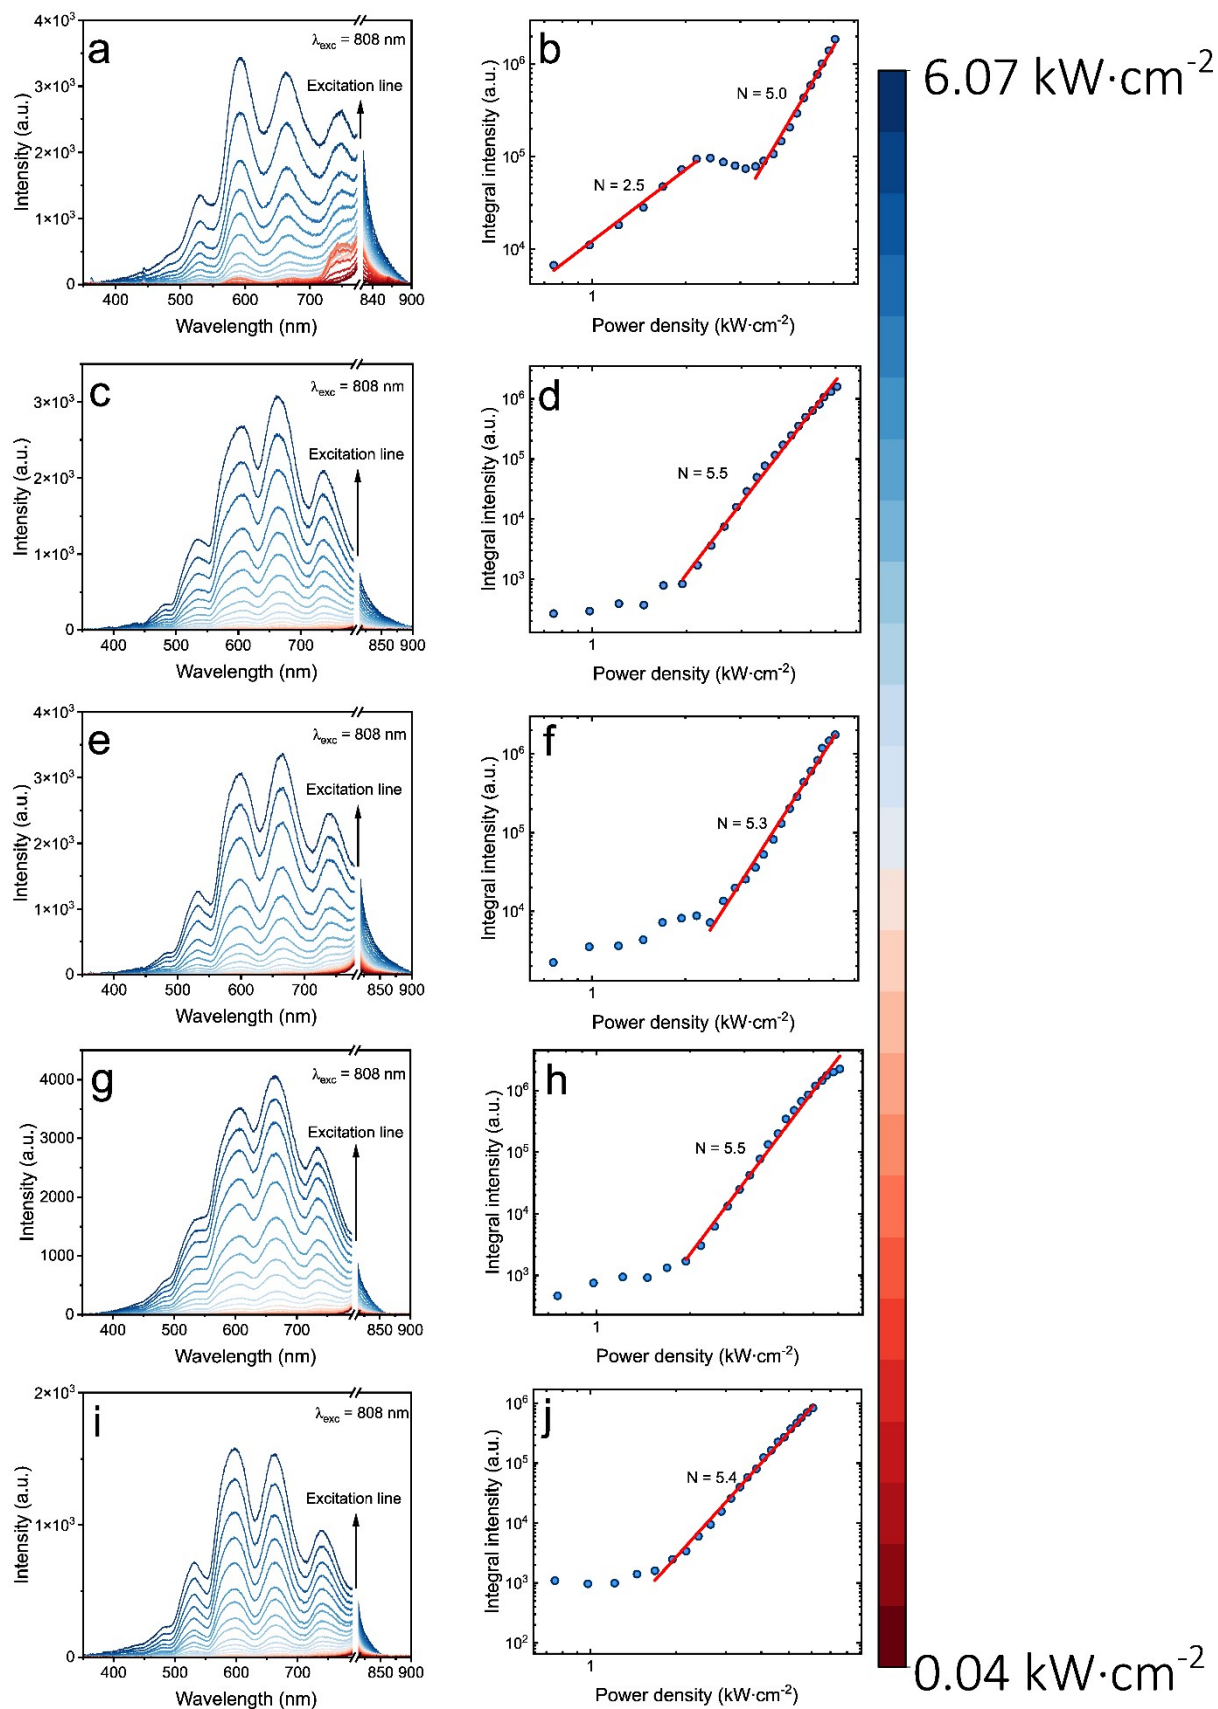

Fig. S4. Power dependence of  $\text{LaAlO}_3:5\text{Nd}^{3+}$  (a-b),  $\text{LaAlO}_3:20\text{Nd}^{3+}$  (c-d),  $\text{LaAlO}_3:40\text{Nd}^{3+}$  (e-f),  $\text{LaAlO}_3:60\text{Nd}^{3+}$  (g-h) and  $\text{LaAlO}_3:75\text{Nd}^{3+}$  (i-j).

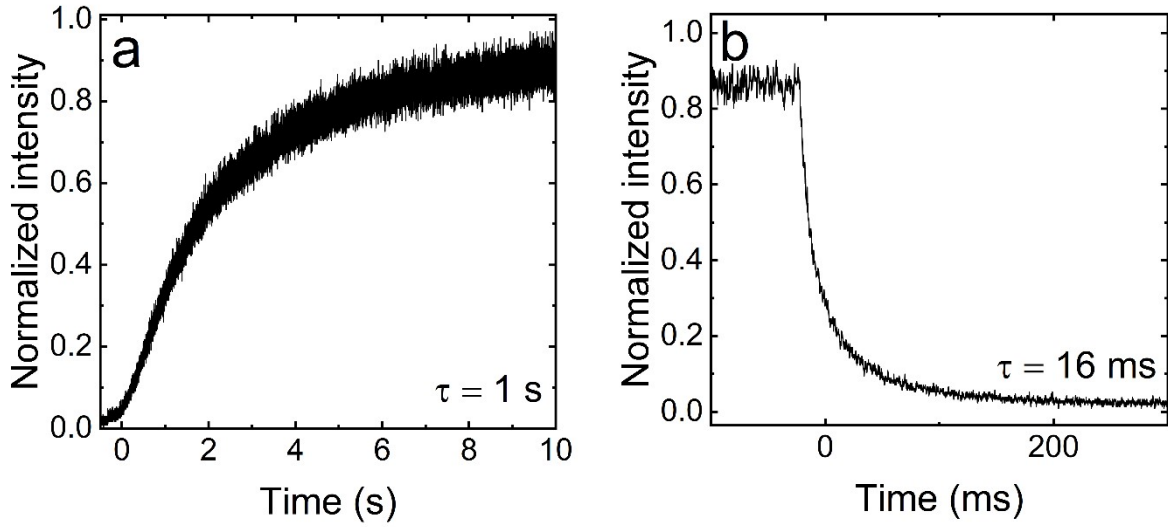

Fig. S5. Rise (a) and decay (b) times for NdAlO<sub>3</sub>.

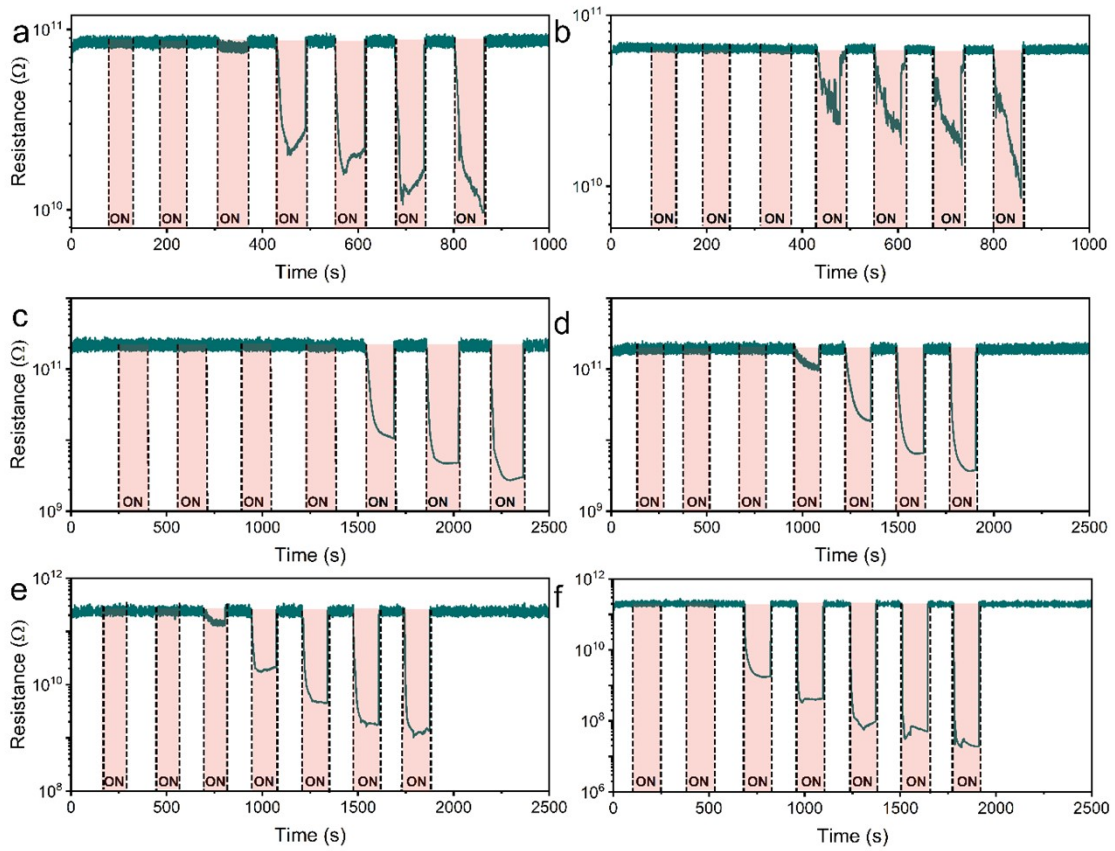

Fig. S6. Photoresistance of LaAlO<sub>3</sub>:1%Nd<sup>3+</sup> (a), LaAlO<sub>3</sub>:5%Nd<sup>3+</sup> (b), LaAlO<sub>3</sub>:20%Nd<sup>3+</sup> (c), LaAlO<sub>3</sub>:40%Nd<sup>3+</sup> (d), LaAlO<sub>3</sub>:60%Nd<sup>3+</sup> (e) and LaAlO<sub>3</sub>:75%Nd<sup>3+</sup> (f) with 1 minute on/off cycles.

Table S1. Correlated color temperature (CCT) of the emission for  $\text{La}_{1-x}\text{Nd}_x\text{AlO}_3$

| <b>Nd<sup>3+</sup> content</b> | <b>CCT (K)</b> |
|--------------------------------|----------------|
| 0                              | 2120           |
| 1                              | 2111           |
| 5                              | 2355           |
| 20                             | 2307           |
| 40                             | 2261           |
| 60                             | 2366           |
| 75                             | 2441           |
| 100                            | 2354           |
